# Supplementary material for: Single and repeated dose toxicity of citric acid-based carbon dots and a derivative in mice
Source: Royal Society of Chemistry journal article supplement (doi:10.1039/c5ra18391j), 2015-01-01
Supplement: c5ra18391j1.pdf [file c5ra18391j1.pdf]

## Single and repeated dose toxicity of citric acid-based carbon dots and a derivative in mice

Xiao Zheng,<sup>†a</sup> Dan Shao,<sup>‡a</sup> Jing Li,<sup>a</sup> Yubin Song,<sup>b</sup> Yujing Chen,<sup>a</sup> Yue  
Pan,<sup>a</sup> Shoujun Zhu,<sup>b</sup> Bai Yang<sup>\*b</sup> and Li Chen<sup>\*a, c</sup>

<sup>a</sup>Department of Pharmacology, Nanomedicine Engineering Laboratory of  
Jilin Province, College of Basic Medical Sciences, Jilin University, Changchun  
130021,

China. E-mail: [chenl@jlu.edu.cn](mailto:chenl@jlu.edu.cn)

<sup>b</sup>State Key Laboratory of Supramolecular Structure and Materials, College of  
Chemistry, Jilin University, Changchun, 130012, P. R. China. E-mail:  
[byangchem@jlu.edu.cn](mailto:byangchem@jlu.edu.cn)

<sup>c</sup>School of Nursing, Jilin University, Changchun 130021, China

<sup>†</sup>Electronic supplementary information (ESI) available: Further experimental  
details and figures. See DOI: 10.1039/c000000x/

<sup>‡</sup>These authors contributed equally.

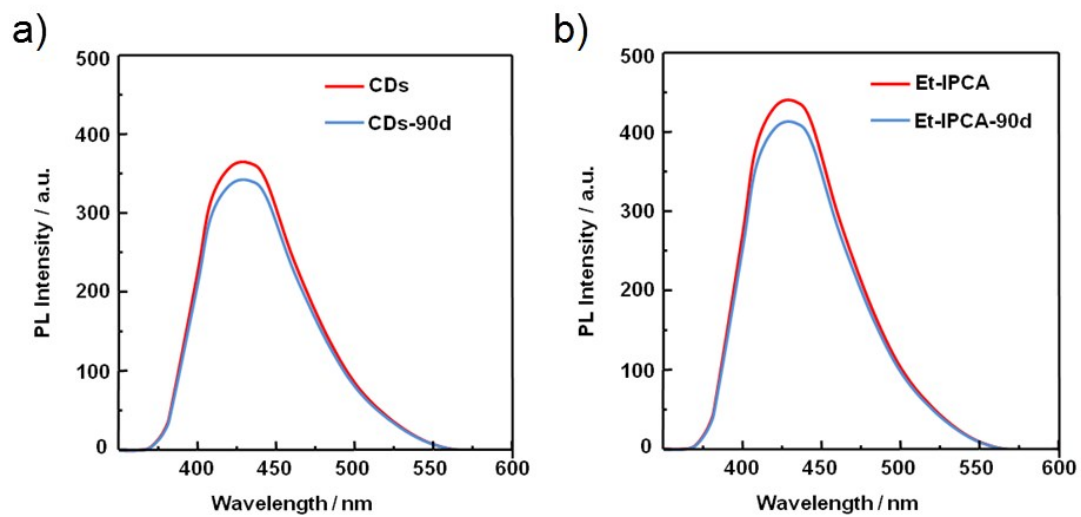

**Fig. S1** PL images and photostability data for the CDs and Et-IPCA stored at room temperature.

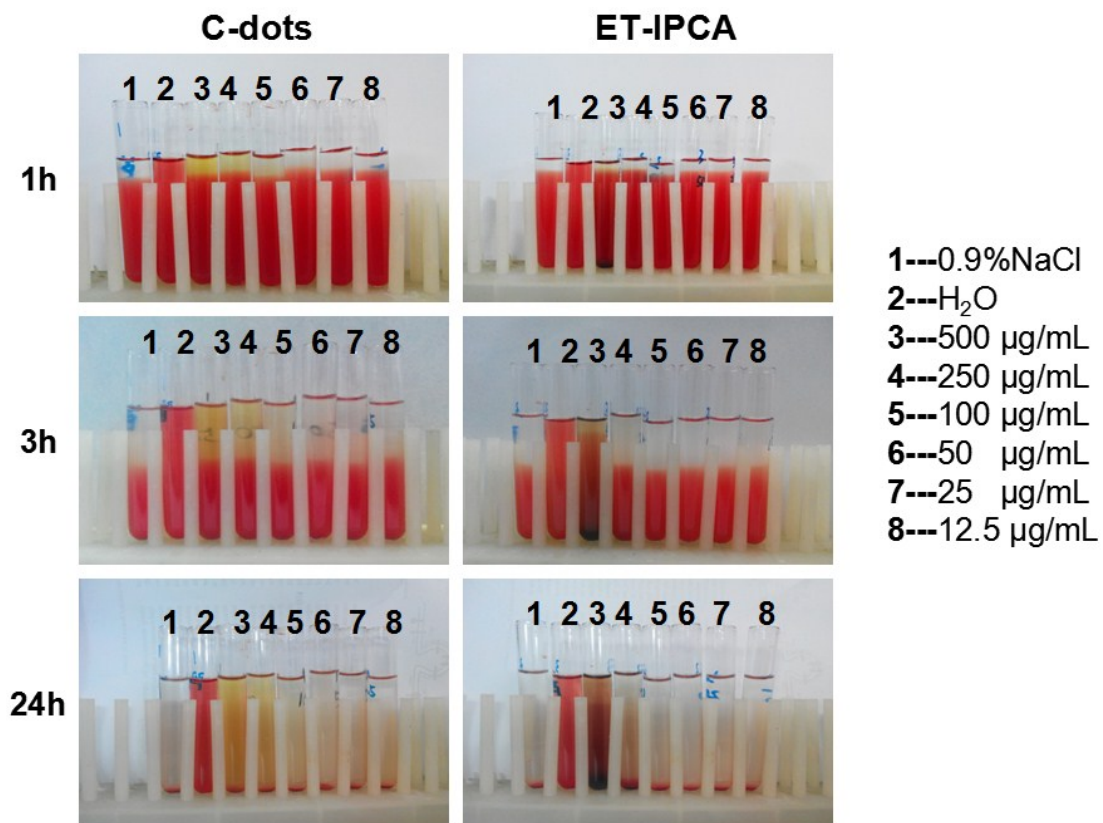

**Fig. S2** Hemolysis images of the CDs and Et-IPCA.
